# Supplementary material
Source: PubMed Central journal article supplement (PMC4344858)

Online Supplemental Materials A: Unadjusted Prevalence of Availability of Low-Nutrient, Energy Dense Items by School Location, Minority Enrollment, and Free/Reduced Price Lunch Status, Minnesota, 2008-2012

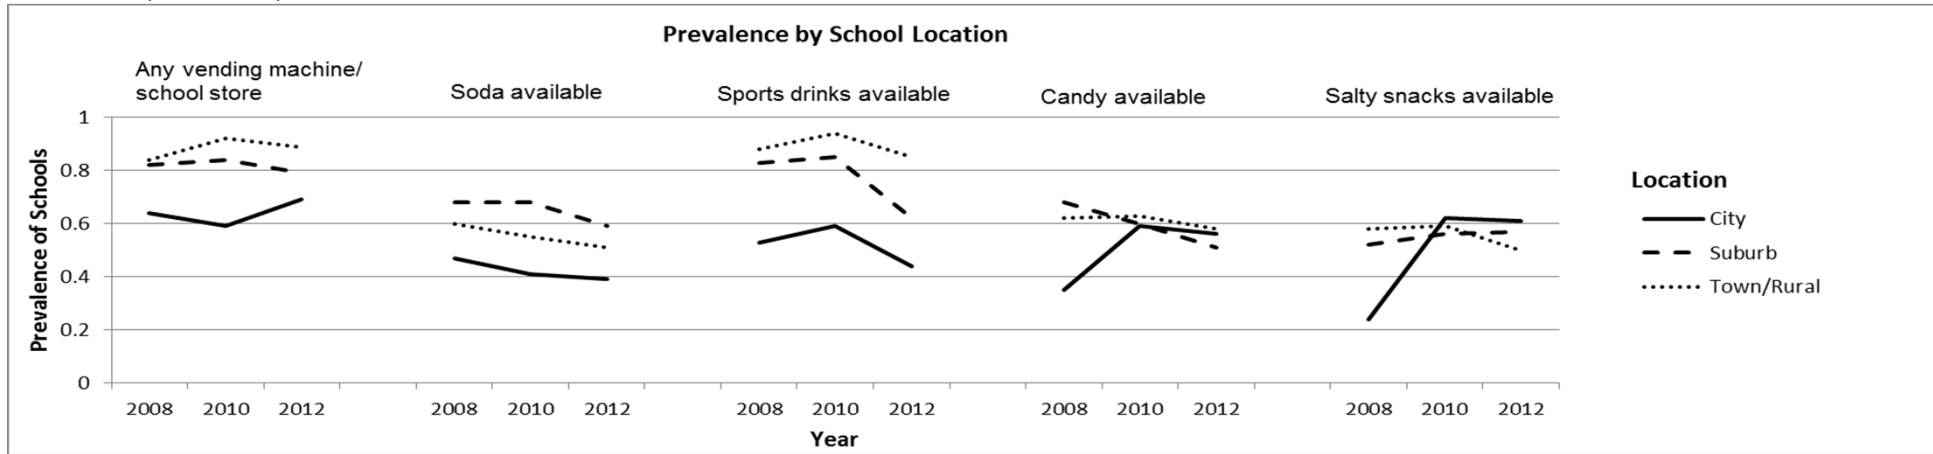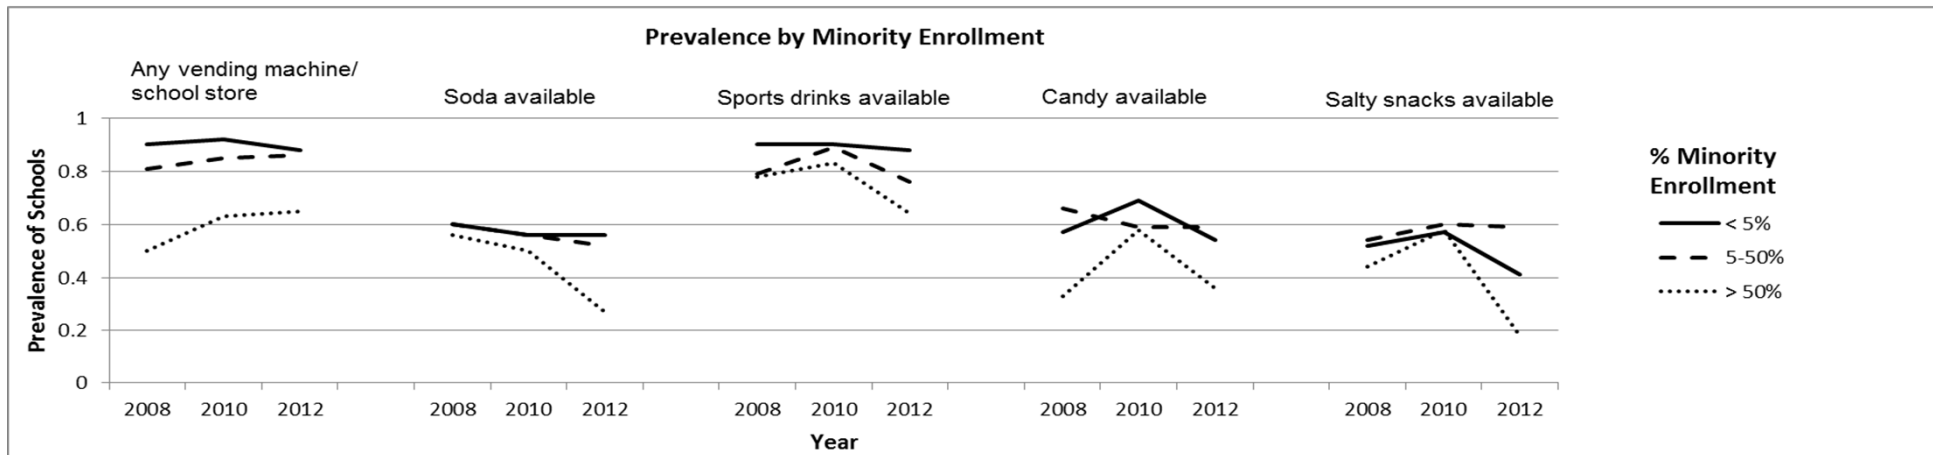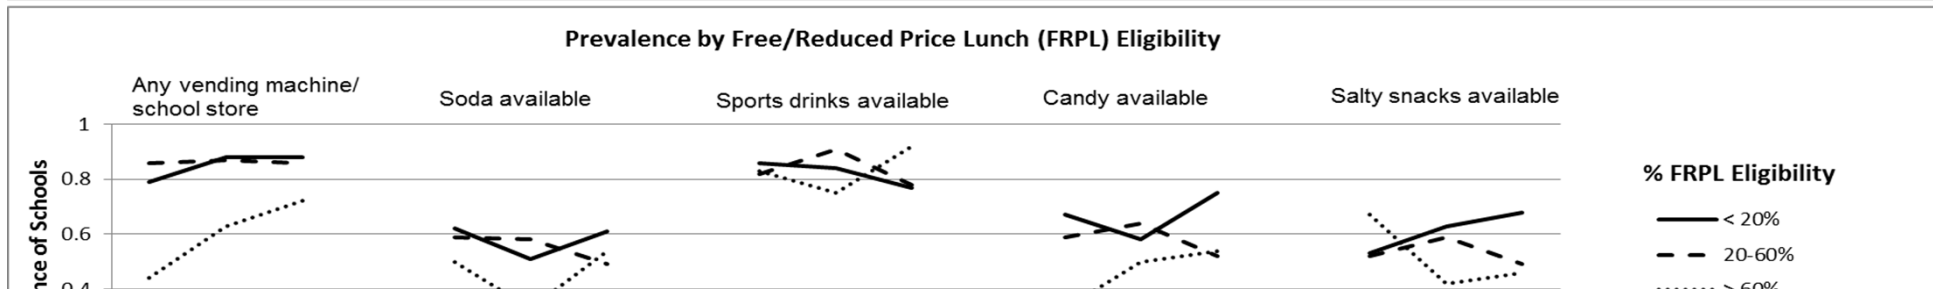

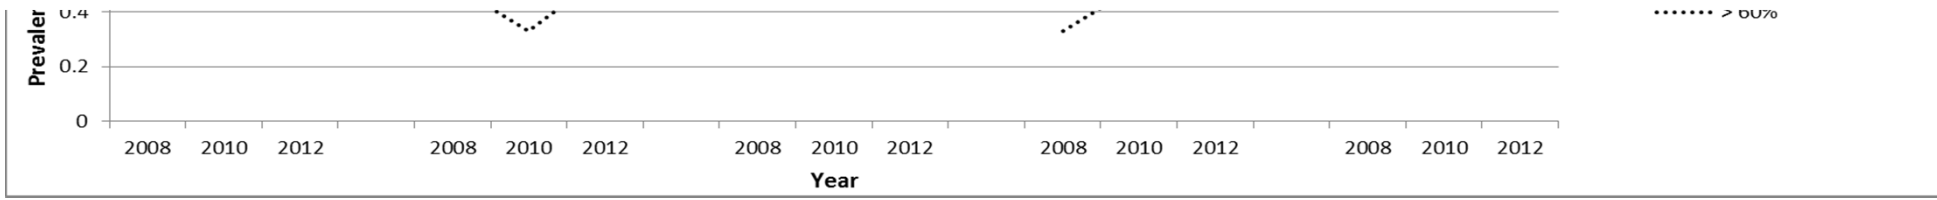

Online Supplemental Materials B: Unadjusted Prevalence of Healthy Eating Strategies by School Location, Minority Enrollment, and Free/Reduced Price Lunch Status, Minnesota, 2008-2012

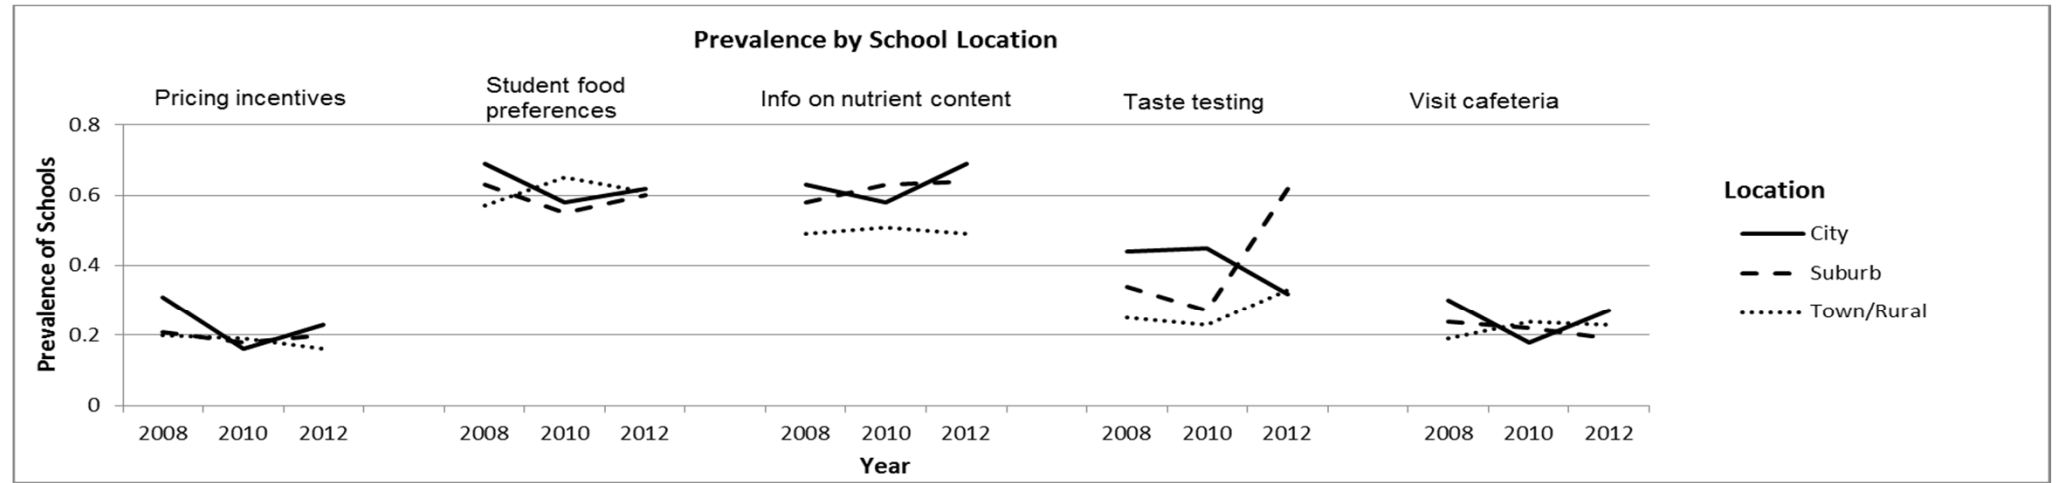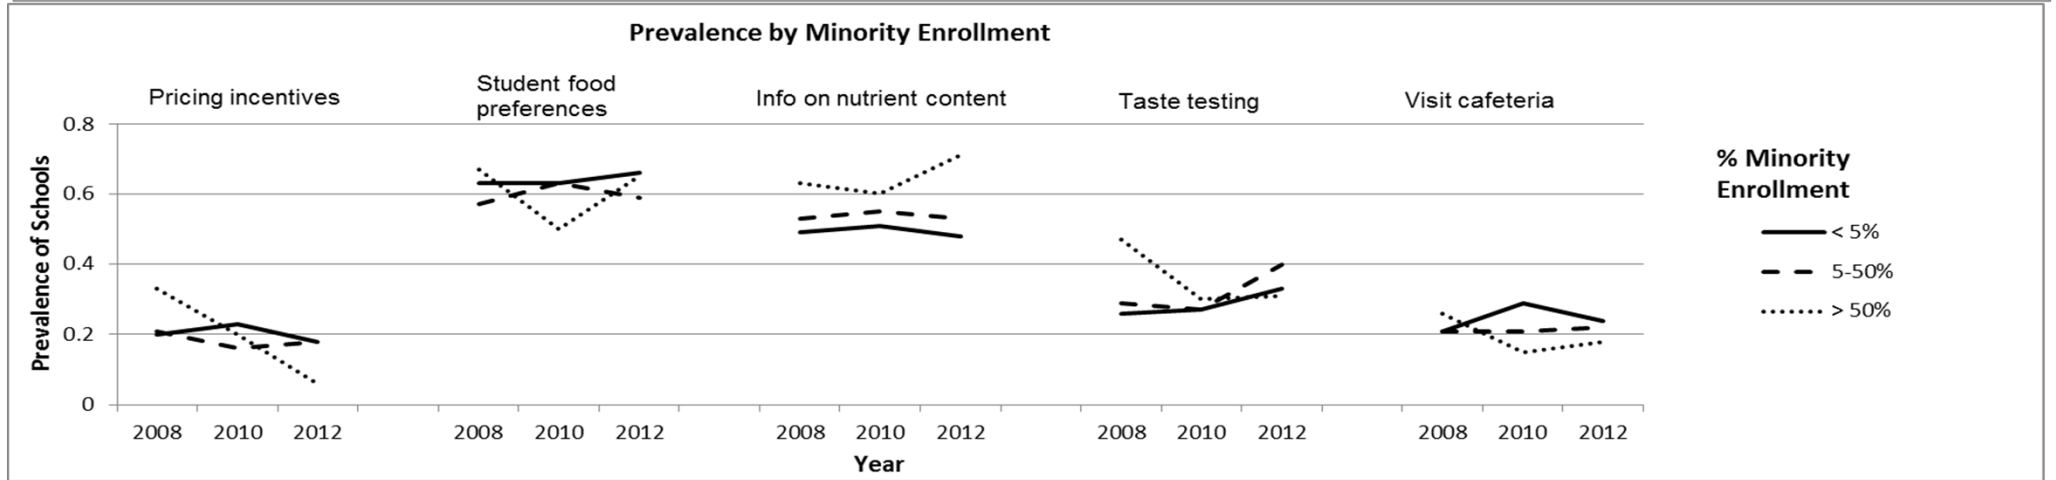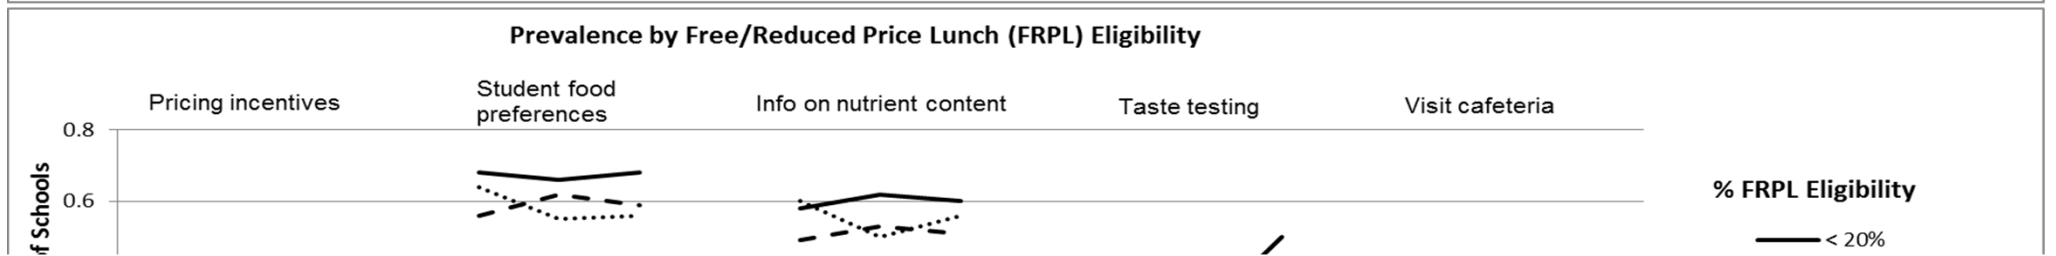

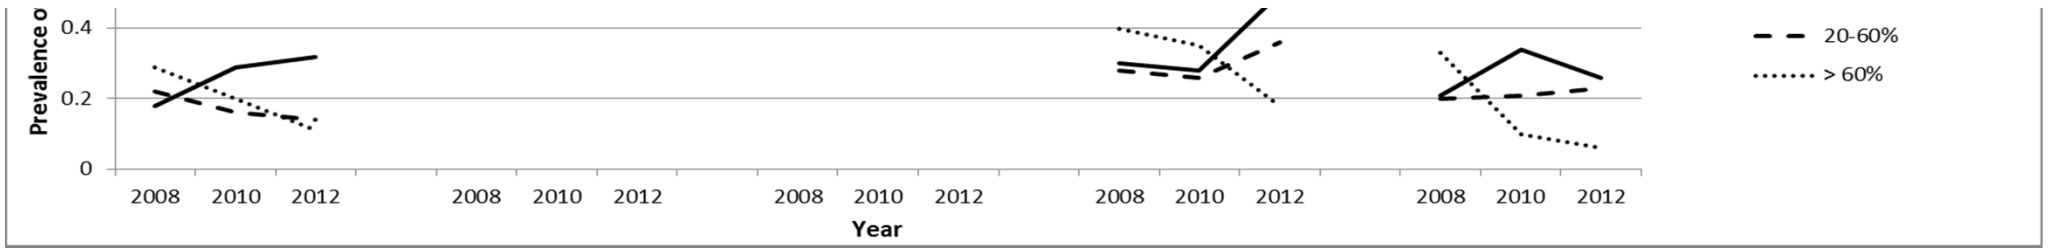

Online Supplemental Materials C: Unadjusted Prevalence of Availability of Banned Advertisements for Low-Nutrient, Energy Dense Items by School Location, Minority Enrollment, and Free/Reduced Price Lunch Status, Minnesota, 2008-2012

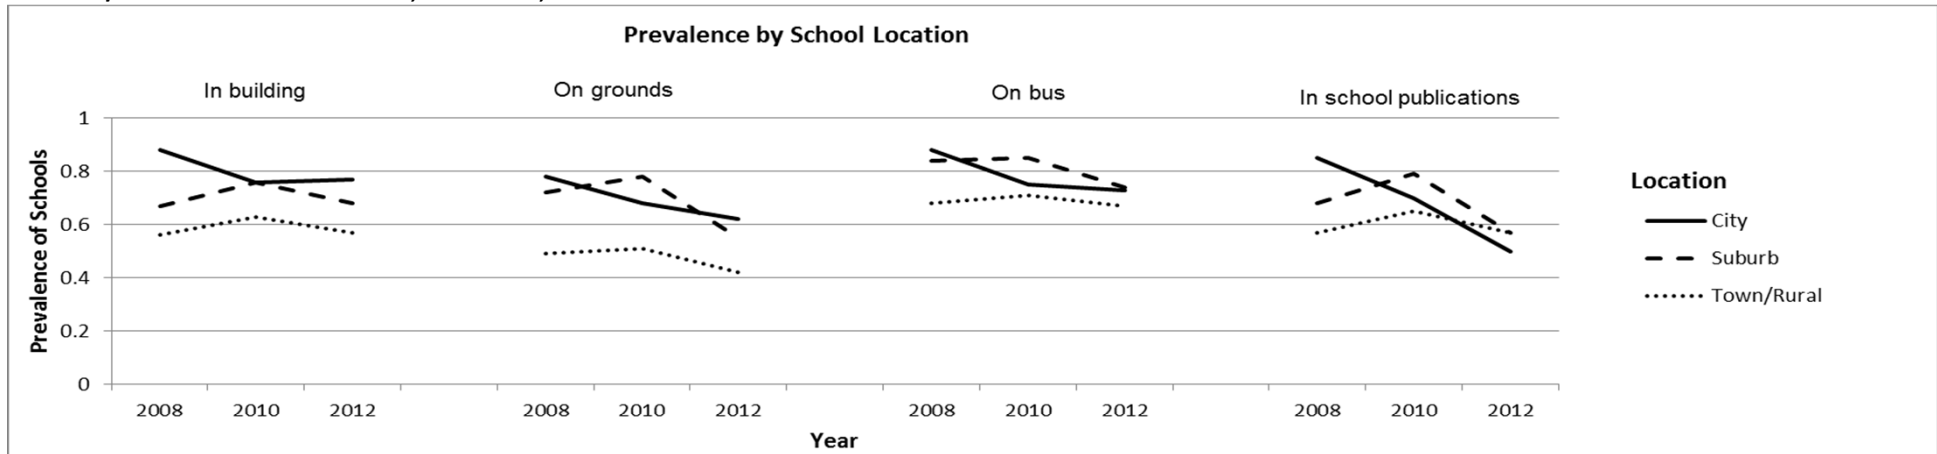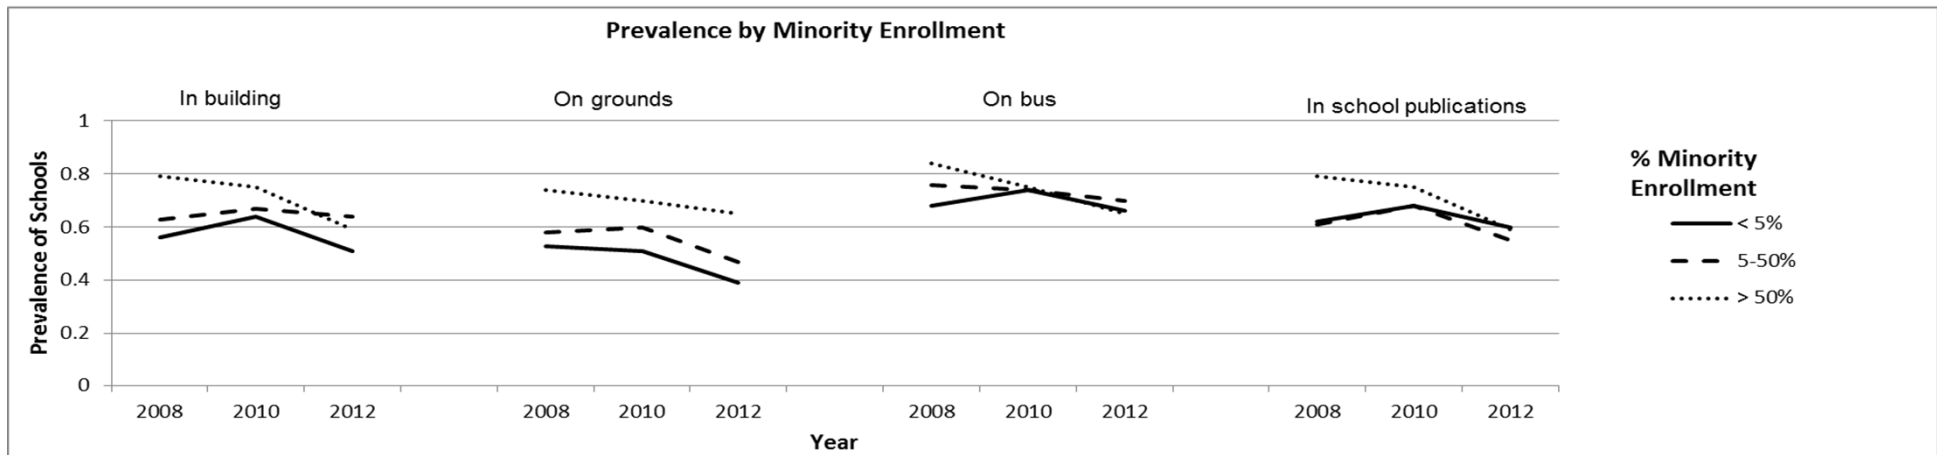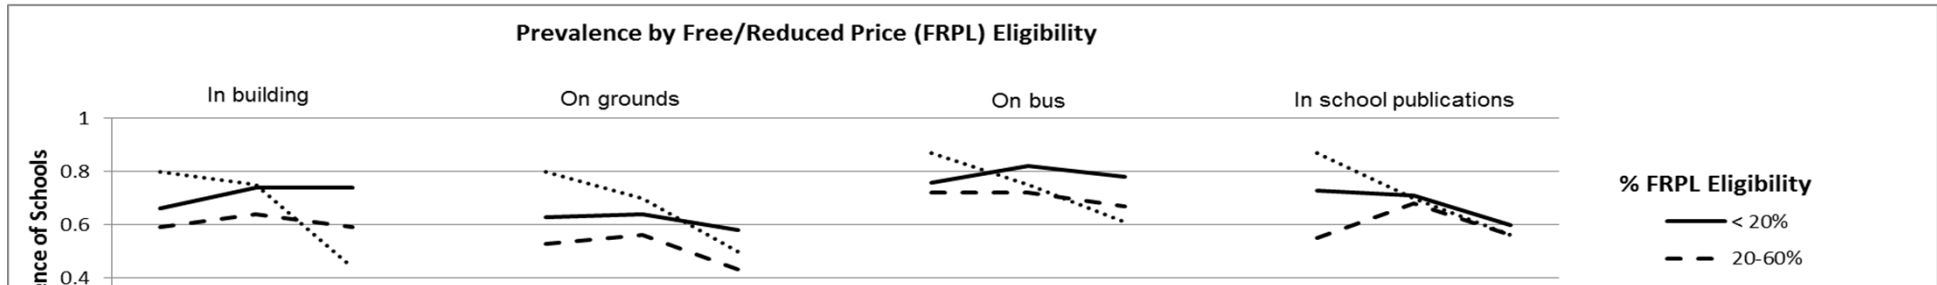

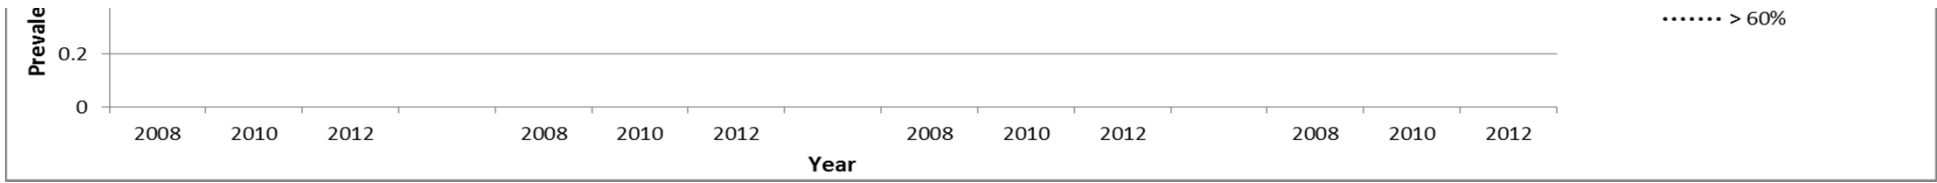

Supplement: NIHMS625442-supplement-01.pdf [file NIHMS625442-supplement-01.pdf]
